# Supplementary material for: Effectiveness of Autologous Platelet Concentrates in the Sinus Lift Surgery: Findings from Systematic Reviews and Meta-Analyses
Source: MDPI journal article supplement (doi:10.3390/dj12040101), 2024-04-10
Supplement: s1 [file s1]

**Table S1:** References excluded and reason for the exclusion.

| Reference                        | Exclusion criteria                                      |
|----------------------------------|---------------------------------------------------------|
| Al-Hamed FS et al, 2019 [72]     | Narrative Review                                        |
| Al-Moraissi EA et al, 2020 [12]  | Main topic is related to bone substitutes, not on APCs  |
| Bernardi S et al, 2020 [73]      | Narrative Review                                        |
| Dai YZ et al, 2011 [74]          | Narrative Review                                        |
| Esposito M et al, 2006 [75]      | Inability to summarize the data                         |
| Farshidfar N et al, 2022 [76]    | Narrative Review                                        |
| Franchini M et al, 2019 [77]     | Lack of conclusion on the efficacy of PRF in sinus lift |
| Kumar KR et al, 2016 [78]        | Narrative Review                                        |
| Maniyar N, 2018 [79]             | Narrative Review                                        |
| Miron RJ et al, 2017 [80]        | Inability to summarize the data                         |
| Wallace SS et Froum SJ, 2003 [4] | Inability to summarize the data                         |
| Yuen T, 2000 [81]                | No free full text available                             |
